# Supplementary material for: Establishing a Framework for the Use of Social Media in Pharmacovigilance in Europe
Source: PubMed Central journal article supplement — Drug Saf. 2019 Mar 30;42(8):921–30. doi: 10.1007/s40264-019-00811-8 (PMC6647461; doi:10.1007/s40264-019-00811-8), 2019-03-30
Supplement: 40264_2019_811_MOESM1_ESM.pdf [file 40264_2019_811_MOESM1_ESM.pdf]

### Establishing a framework for the use of social media in pharmacovigilance in Europe; Drug Safety

(Survey results published as 26. Lengsavath M, Dal Pra A, de Ferran A, Brosch S, Harmark L, Newbould V, Goncalves S. Social Media Monitoring and Adverse Drug Reaction Reporting in Pharmacovigilance: An Overview of the Regulatory Landscape. *Therapeutic Innovation & Regulatory Science*. 2016; 51(1): 125-131. Available from: doi: 10.1177/2168479016663264)

**Sabine Brosch [1], Anne-Marie de Ferran [2], Victoria Newbould [1], Diane Farkas [2]; Marina Lengsavath [2], Phil Tregunno [3]**

[1] Surveillance and Epidemiology Services, Pharmacovigilance and Epidemiology Department, European Medicines Agency (EMA), 30 Churchill Place, Canary Wharf, London, E14 5EU, UK

[2] Sanofi, avenue Pierre Brossolette - 91385 Chilly-Mazarin Cedex - France

[3] Medicines & Healthcare products Regulatory Agency, 10 South Colonnade, Canary Wharf, London, E14 4PU, UK

Corresponding author: sabine.brosch@ema.europa.eu

| Countries                     | National PV legislation | legal requirements on social media PV monitoring |
|-------------------------------|-------------------------|--------------------------------------------------|
| Afghanistan                   | No*                     | No                                               |
| Albania                       | Yes                     | No                                               |
| Algeria                       | Yes                     | No                                               |
| Angola                        | Yes                     | No                                               |
| Antigua and Barbuda           | No*                     | No                                               |
| Argentina                     | Yes                     | No                                               |
| Armenia                       | No                      | No                                               |
| Australia                     | Yes                     | Yes                                              |
| Austria                       | Yes                     | Yes                                              |
| Azerbaijan                    | No                      | No                                               |
| Bahamas                       | No                      | No                                               |
| Bahrain                       | Yes                     | No                                               |
| Bangladesh                    | Yes                     | No                                               |
| Barbados                      | No                      | No                                               |
| Belarus                       | Yes                     | No                                               |
| Belgium                       | Yes                     | Yes                                              |
| Belize                        | Yes                     | No                                               |
| Benin                         | Yes                     | No                                               |
| Bhutan                        | No*                     | No                                               |
| Bolivia                       | Yes                     | No                                               |
| Bosnia and Herzegovina        | Yes                     | No                                               |
| Botswana                      | Yes                     | No                                               |
| Brazil                        | Yes                     | No                                               |
| Brunei Darussalam             | Yes                     | No                                               |
| Bulgaria                      | Yes                     | Yes                                              |
| Burkina Faso                  | Yes                     | No                                               |
| Burundi                       | No                      | No                                               |
| Cambodia                      | Yes                     | No                                               |
| Cameroon                      | Yes                     | No                                               |
| Canada                        | Yes                     | No                                               |
| Cape Verde                    | No                      | No                                               |
| Central African Republic      | Planned                 | No                                               |
| Chad                          | Planned                 | No                                               |
| Chile                         | Yes                     | No                                               |
| China                         | Yes                     | No                                               |
| Colombia                      | Yes                     | No                                               |
| Comoros                       | Yes                     | No                                               |
| Congo, Democratic Republic of | Planned                 | No                                               |
| Congo, Republic of            | Planned                 | No                                               |
| Costa Rica                    | Yes                     | No                                               |
| Croatia                       | Yes                     | Yes                                              |

| Legal requirements on social media PV monitoring | Yes       | No         | Total      |
|--------------------------------------------------|-----------|------------|------------|
| National PV legislation - No/Planned             | 0         | 53         | 53         |
| National PV legislation - Yes                    | 37        | 92         | 129        |
| <b>Total</b>                                     | <b>37</b> | <b>145</b> | <b>182</b> |

63%

29%

|                    |         |     |
|--------------------|---------|-----|
| Cuba               | Yes     | No  |
| Cyprus             | Yes     | Yes |
| Czech Republic     | Yes     | Yes |
| Denmark            | Yes     | Yes |
| Djibouti           | No      | No  |
| Dominica           | No*     | No  |
| Dominican Republic | Yes     | No  |
| Ecuador            | Yes     | No  |
| Egypt              | Yes     | Yes |
| El Salvador        | No      | No  |
| Equatorial Guinea  | Planned | No  |
| Eritrea            | No      | No  |
| Estonia            | Yes     | Yes |
| Ethiopia           | Yes     | No  |
| Fiji               | No*     | No  |
| Finland            | Yes     | Yes |
| France             | Yes     | Yes |
| Gabon              | Yes     | No  |
| Gambia             | No      | No  |
| Georgia            | No      | No  |
| Germany            | Yes     | Yes |
| Ghana              | Yes     | No  |
| Greece             | Yes     | Yes |
| Grenada            | No*     | No  |
| Guatemala          | Yes     | No  |
| Guinea             | Yes     | No  |
| Guinea-Bissau      | No      | No  |
| Guyana             | No*     | No  |
| Haiti              | No      | No  |
| Honduras           | No      | No  |
| Hong Kong          | Yes     | No  |
| Hungary            | Yes     | Yes |
| Iceland            | Yes     | Yes |
| India              | Yes     | No  |
| Indonesia          | Yes     | No  |
| Iran               | Yes     | No  |
| Iraq               | Yes     | No  |
| Ireland            | Yes     | Yes |
| Israel             | Yes     | No  |
| Italy              | Yes     | Yes |
| Ivory Coast        | Yes     | No  |
| Jamaica            | Yes     | No  |
| Japan              | Yes     | No  |
| Jordan             | Yes     | No  |
| Kazakhstan         | Yes     | No  |
| Kenya              | Yes     | No  |
| Korea, republic of | Yes     | No  |
| Kosovo             | Yes     | No  |
| Kuwait             | Yes     | No  |
| Kyrgyzstan         | Yes     | No  |
| Laos               | No      | No  |
| Latvia             | Yes     | Yes |
| Lebanon            | Yes     | No  |
| Lesotho            | No      | No  |
| Liberia            | No      | No  |

|                                  |     |     |
|----------------------------------|-----|-----|
| Libya                            | No  | No  |
| Liechtenstein                    | Yes | Yes |
| Lithuania                        | Yes | Yes |
| Luxembourg                       | Yes | Yes |
| Macedonia                        | Yes | No  |
| Madagascar                       | Yes | No  |
| Malawi                           | No  | No  |
| Malaysia                         | Yes | No  |
| Maldives                         | No  | No  |
| Mali                             | Yes | No  |
| Malta                            | Yes | Yes |
| Mauritania                       | No  | No  |
| Mauritius                        | Yes | No  |
| Mexico                           | Yes | No  |
| Moldova                          | Yes | No  |
| Mongolia                         | No  | No  |
| Montenegro                       | Yes | No  |
| Morocco                          | Yes | No  |
| Mozambique                       | Yes | No  |
| Myanmar                          | No  | No  |
| Namibia                          | Yes | No  |
| Nauru                            | No* | No  |
| Nepal                            | Yes | No  |
| Netherlands                      | Yes | Yes |
| New Zealand                      | Yes | No  |
| Nicaragua                        | Yes | No  |
| Niger                            | Yes | No  |
| Nigeria                          | Yes | No  |
| Norway                           | Yes | Yes |
| Oman                             | Yes | No  |
| Pakistan                         | Yes | No  |
| Palestinian Territory, Occupied  | No  | No  |
| Panama                           | Yes | No  |
| Paraguay                         | Yes | No  |
| Peru                             | Yes | No  |
| Philippines                      | Yes | No  |
| Poland                           | Yes | Yes |
| Portugal                         | Yes | Yes |
| Qatar                            | Yes | No  |
| Romania                          | Yes | Yes |
| Russia                           | Yes | No  |
| Rwanda                           | No  | No  |
| Saint Kitts and Nevis            | No* | No  |
| Saint Lucia                      | No* | No  |
| Saint Vincent and the Grenadines | No* | No  |
| Sao Tome and Principe            | No  | No  |
| Saudi Arabia                     | Yes | Yes |
| Senegal                          | Yes | No  |
| Serbia                           | Yes | No  |
| Seychelles                       | No  | No  |
| Sierra Leone                     | No  | No  |
| Singapore                        | Yes | No  |
| Slovakia                         | Yes | Yes |
| Slovenia                         | Yes | Yes |
| Somalia                          | No  | No  |

|                      |     |      |
|----------------------|-----|------|
| South Africa         | Yes | Yes  |
| South Sudan          | No  | No   |
| Spain                | Yes | Yes  |
| Sri Lanka            | Yes | No   |
| Sudan                | Yes | No   |
| Suriname             | No* | No   |
| Swaziland            | No  | No   |
| Sweden               | Yes | Yes  |
| Switzerland          | Yes | No   |
| Syria                | No  | No   |
| Taiwan               | Yes | No   |
| Tajikistan           | No  | No   |
| Tanzania             | Yes | No   |
| Thailand             | Yes | No   |
| Togo                 | Yes | No   |
| Trinidad and Tobago  | No  | No   |
| Tunisia              | Yes | No   |
| Turkey               | Yes | Yes  |
| Turkmenistan         | No  | No   |
| Uganda               | Yes | No   |
| Ukraine              | Yes | No   |
| United Arab Emirates | Yes | No   |
| United Kingdom       | Yes | Yes  |
| Uruguay              | Yes | No   |
| USA                  | Yes | Yes? |
| Uzbekistan           | No  | No   |
| Venezuela            | Yes | No   |
| Vietnam              | Yes | No   |
| Yemen                | Yes | No   |
| Zambia               | Yes | No   |
| Zimbabwe             | Yes | No   |
