# Supplementary material for: Establishing a Framework for the Use of Social Media in Pharmacovigilance in Europe
Source: PubMed Central journal article supplement — Drug Saf. 2019 Mar 30;42(8):921–30. doi: 10.1007/s40264-019-00811-8 (PMC6647461; doi:10.1007/s40264-019-00811-8), 2019-03-30
Supplement: 40264_2019_811_MOESM2_ESM.pdf [file 40264_2019_811_MOESM2_ESM.pdf]

**Establishing a framework for the use of social media in pharmacovigilance in Europe; Drug Safety**

**(Survey results published as Lengsavath M, Dal Pra A, de Ferran A, Brosch S, Harmark L, Newbould V, Goncalves S. Social Media Monitoring and Adverse Drug Reaction Reporting in Pharmacovigilance: An Overview of the Regulatory Landscape. Therapeutic Innovation & Regulatory Science. 2016; 51(1): 125-131. Available from: doi: 10.1177/2168479016663264)**

**Sabine Brosch [1] , Anne-Marie de Ferran [2], Victoria Newbould [1], Diane Farkas [2]; Marina Lengsavath [2], Phil Tregunno [3]**

**[1] Surveillance and Epidemiology Services, Pharmacovigilance and Epidemiology Department, European Medicines Agency (EMA), 30 Churchill Place, Canary Wharf, London, E14 5EU, UK**

**[2] Sanofi, 1, avenue Pierre Brossolette - 91385 Chilly-Mazarin Cedex - France**

**[3] Medicines & Healthcare products Regulatory Agency, 10 South Colonnade, Canary Wharf , London, E14 4PU, UK**

**Corresponding author: [sabine.brosch@ema.europa.eu](mailto:sabine.brosch@ema.europa.eu)**

Table S3 - List of countries/ jurisdictions queried with national PV legislation status

| Countries              | National PV legislation | legal requirements on social media PV monitoring |
|------------------------|-------------------------|--------------------------------------------------|
| Afghanistan            | Yes                     | No                                               |
| Albania                | Yes                     | No                                               |
| Algeria                | Yes                     | No                                               |
| Angola                 | Yes                     | No                                               |
| Antigua and Barbuda    | No                      | No                                               |
| Argentina              | Yes                     | No                                               |
| Armenia                | No                      | No                                               |
| Australia              | Yes                     | Yes                                              |
| Austria                | Yes                     | Yes                                              |
| Azerbaijan             | No                      | No                                               |
| Bahamas                | No                      | No                                               |
| Bahrain                | Yes                     | No                                               |
| Bangladesh             | Yes                     | No                                               |
| Barbados               | No                      | No                                               |
| Belarus                | Yes                     | No                                               |
| Belgium                | Yes                     | Yes                                              |
| Belize                 | Yes                     | No                                               |
| Benin                  | Yes                     | No                                               |
| Bhutan                 | No                      | No                                               |
| Bolivia                | Yes                     | No                                               |
| Bosnia and Herzegovina | Yes                     | No                                               |
| Botswana               | Yes                     | No                                               |
| Brazil                 | Yes                     | No                                               |
| Brunei Darussalam      | Yes                     | No                                               |

|                               |         |     |
|-------------------------------|---------|-----|
| Bulgaria                      | Yes     | Yes |
| Burkina Faso                  | Yes     | No  |
| Burundi                       | No      | No  |
| Cambodia                      | Yes     | No  |
| Cameroon                      | Yes     | No  |
| Canada                        | Yes     | No  |
| Cape Verde                    | No      | No  |
| Central African Republic      | Planned | No  |
| Chad                          | Planned | No  |
| Chile                         | Yes     | No  |
| China                         | Yes     | No  |
| Colombia                      | Yes     | No  |
| Comoros                       | Yes     | No  |
| Congo, Democratic Republic of | Planned | No  |
| Congo, Republic of            | Planned | No  |
| Costa Rica                    | Yes     | No  |
| Croatia                       | Yes     | Yes |
| Cuba                          | Yes     | No  |
| Cyprus                        | Yes     | Yes |
| Czech Republic                | Yes     | Yes |
| Denmark                       | Yes     | Yes |
| Djibouti                      | No      | No  |
| Dominica                      | No      | No  |
| Dominican Republic            | Yes     | No  |
| Ecuador                       | Yes     | No  |
| Egypt                         | Yes     | Yes |
| El Salvador                   | No      | No  |
| Equatorial Guinea             | Planned | No  |
| Eritrea                       | No      | No  |
| Estonia                       | Yes     | Yes |
| Ethiopia                      | Yes     | No  |
| Fiji                          | No      | No  |
| Finland                       | Yes     | Yes |
| France                        | Yes     | Yes |
| Gabon                         | Yes     | No  |
| Gambia                        | No      | No  |
| Georgia                       | No      | No  |
| Germany                       | Yes     | Yes |
| Ghana                         | Yes     | No  |
| Greece                        | Yes     | Yes |
| Grenada                       | No      | No  |
| Guatemala                     | Yes     | No  |
| Guinea                        | Yes     | No  |
| Guinea-Bissau                 | No      | No  |
| Guyana                        | No      | No  |
| Haiti                         | No      | No  |
| Honduras                      | No      | No  |
| Hong Kong                     | Yes     | No  |
| Hungary                       | Yes     | Yes |
| Iceland                       | Yes     | Yes |
| India                         | Yes     | No  |
| Indonesia                     | Yes     | No  |
| Iran                          | Yes     | No  |
| Iraq                          | Yes     | No  |
| Ireland                       | Yes     | Yes |
| Israel                        | Yes     | No  |
| Italy                         | Yes     | Yes |
| Ivory Coast                   | Yes     | No  |
| Jamaica                       | Yes     | No  |
| Japan                         | Yes     | No  |

|                                  |     |     |
|----------------------------------|-----|-----|
| Jordan                           | Yes | No  |
| Kazakhstan                       | Yes | No  |
| Kenya                            | Yes | No  |
| Korea, republic of               | Yes | No  |
| Kosovo                           | Yes | No  |
| Kuwait                           | Yes | No  |
| Kyrgyzstan                       | Yes | No  |
| Laos                             | No  | No  |
| Latvia                           | Yes | Yes |
| Lebanon                          | Yes | No  |
| Lesotho                          | No  | No  |
| Liberia                          | No  | No  |
| Libya                            | No  | No  |
| Liechtenstein                    | Yes | Yes |
| Lithuania                        | Yes | Yes |
| Luxembourg                       | Yes | Yes |
| Macedonia                        | Yes | No  |
| Madagascar                       | Yes | No  |
| Malawi                           | No  | No  |
| Malaysia                         | Yes | No  |
| Maldives                         | No  | No  |
| Mali                             | Yes | No  |
| Malta                            | Yes | Yes |
| Mauritania                       | No  | No  |
| Mauritius                        | Yes | No  |
| Mexico                           | Yes | No  |
| Moldova                          | Yes | No  |
| Mongolia                         | No  | No  |
| Montenegro                       | Yes | No  |
| Morocco                          | Yes | No  |
| Mozambique                       | Yes | No  |
| Myanmar                          | No  | No  |
| Namibia                          | Yes | No  |
| Nauru                            | No  | No  |
| Nepal                            | Yes | No  |
| Netherlands                      | Yes | Yes |
| New Zealand                      | Yes | No  |
| Nicaragua                        | Yes | No  |
| Niger                            | Yes | No  |
| Nigeria                          | Yes | No  |
| Norway                           | Yes | Yes |
| Oman                             | Yes | No  |
| Pakistan                         | Yes | No  |
| Palestinian Territory, Occupied  | No  | No  |
| Panama                           | Yes | No  |
| Paraguay                         | Yes | No  |
| Peru                             | Yes | No  |
| Philippines                      | Yes | No  |
| Poland                           | Yes | Yes |
| Portugal                         | Yes | Yes |
| Qatar                            | Yes | No  |
| Romania                          | Yes | Yes |
| Russia                           | Yes | No  |
| Rwanda                           | No  | No  |
| Saint Kitts and Nevis            | No  | No  |
| Saint Lucia                      | No  | No  |
| Saint Vincent and the Grenadines | No  | No  |
| Sao Tome and Principe            | No  | No  |
| Saudi Arabia                     | Yes | Yes |
| Senegal                          | Yes | No  |

|                      |     |     |
|----------------------|-----|-----|
| Serbia               | Yes | No  |
| Seychelles           | No  | No  |
| Sierra Leone         | No  | No  |
| Singapore            | Yes | No  |
| Slovakia             | Yes | Yes |
| Slovenia             | Yes | Yes |
| Somalia              | No  | No  |
| South Africa         | Yes | Yes |
| South Sudan          | No  | No  |
| Spain                | Yes | Yes |
| Sri Lanka            | Yes | No  |
| Sudan                | Yes | No  |
| Suriname             | No  | No  |
| Swaziland            | No  | No  |
| Sweden               | Yes | Yes |
| Switzerland          | Yes | No  |
| Syria                | No  | No  |
| Taiwan               | Yes | No  |
| Tajikistan           | No  | No  |
| Tanzania             | Yes | No  |
| Thailand             | Yes | No  |
| Togo                 | Yes | No  |
| Trinidad and Tobago  | No  | No  |
| Tunisia              | Yes | No  |
| Turkey               | Yes | Yes |
| Turkmenistan         | No  | No  |
| Uganda               | Yes | No  |
| Ukraine              | Yes | No  |
| United Arab Emirates | Yes | No  |
| United Kingdom       | Yes | Yes |
| Uruguay              | Yes | No  |
| USA                  | Yes | Yes |
| Uzbekistan           | No  | No  |
| Venezuela            | Yes | No  |
| Vietnam              | Yes | No  |
| Yemen                | Yes | No  |
| Zambia               | Yes | No  |
| Zimbabwe             | Yes | No  |
